# Supplementary material for: A simple way to identify non-viable cells within living plant tissue using confocal microscopy
Source: PubMed Central journal article supplement (PMC2442066; doi:10.1186/1746-4811-4-15), 2008-06-23

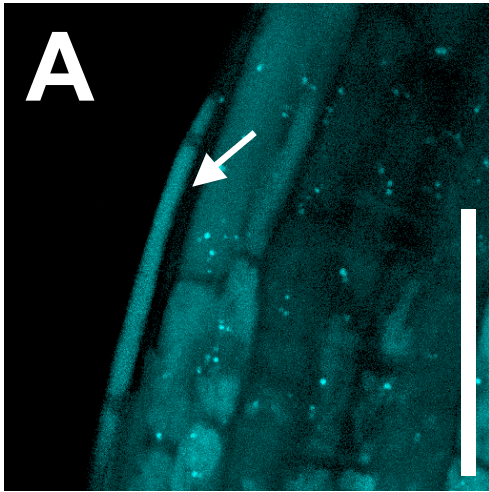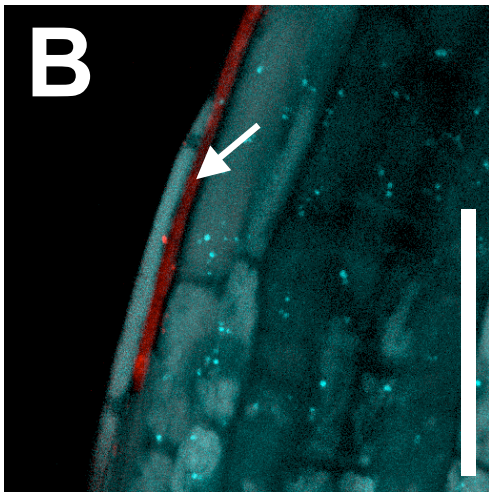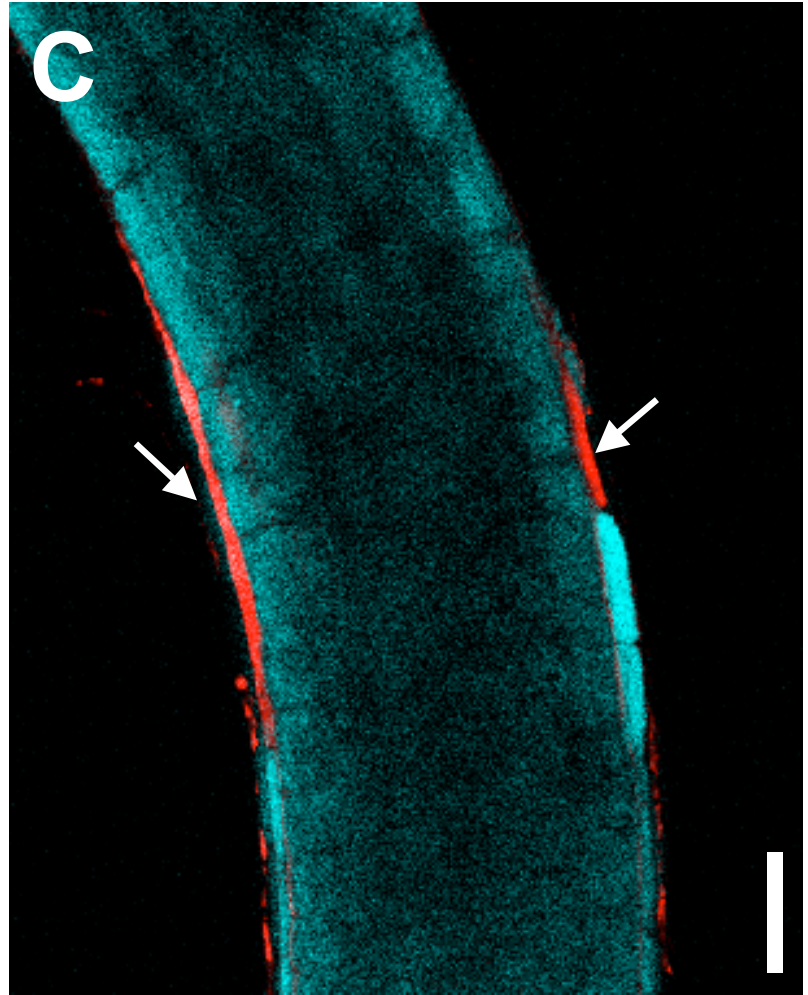

Supplement: 1746-4811-4-15-S1.pdf [file 1746-4811-4-15-S1.pdf]
